# Supplementary material
Source: PubMed Central journal article supplement (PMC6626659)
Supplement: NIHMS1031040-supplement-online_methods.pdf [file NIHMS1031040-supplement-online_methods.pdf]

1

## 2 **ONLINE METHODS**

### 3 **Patients**

4 The two affected brothers were born to nonconsanguineous parents with no family  
5 history of neurodevelopment disorders. Both patients were negative for FRA(X)  
6 syndrome and chromosome microarray tests. The parents and the three female siblings  
7 are healthy.

8 Patient 1 was born at term after caesarian section weighing 4,160 g. Examined at the  
9 age of 34, presented at physical examination: height 1.81 m, weight 86 kg, hair whorls,  
10 thick eyebrows (without synophris), large mouth, widely spaced nipples, normal  
11 genitalia and shortened Achilles tendons. Temporal irritative focus was detected by  
12 routine EEG at the age of 6, but without any convulsive or other epilepsy manifestations.  
13 He presented mild intellectual disability, without significant delayed motor milestones,  
14 but exhibited stuttering and difficulties in the articulation of words. He attends to a  
15 special education school, having achieved a level equivalent to 3rd-4th degree of  
16 elementary schooling.

17 Patient 2 was born at term after caesarian section weighing 3,890 g. Physical  
18 examination at the age of 32 showed: height 1.71 m, weight 55 kg, moderate degree of  
19 frontal balding, hair whorls, thick eyebrows (without synophris), large mouth, normal  
20 genitalia. Similarly to his brother, he presented a mild intellectual disability; he did not  
21 present significant delayed motor milestones, with pronounced difficulties in the

22 articulation of words. He also attends to a special education school, having achieved a  
23 level equivalent to 3rd-4th degree of elementary schooling.

24 This study was approved by the ethics committee of the Institute of Biosciences  
25 (University of São Paulo, São Paulo, Brazil), and written informed consent was obtained  
26 from parents. The current work is in compliance with all relevant ethical regulations.

27

## 28 **Whole Exome Sequencing**

29 DNA samples were prepared using the AmpliSeq Exome library, according to the  
30 manufacturer's specifications. The AmpliSeq libraries were single-end sequenced on an  
31 Ion Proton™ System at Beijing Genomics Institute (BGI, Beijing, China). The raw reads  
32 were aligned to the reference genome (GRCh37/hg19), using BWA<sup>51</sup>, and pre-processed  
33 according to GATK toolkit<sup>52</sup>. Filtering and prioritization of variants were conducted using  
34 VarSeq® software (Golden Helix, Bozeman, MT, USA). The variants were filtered per  
35 population frequency ( $<0.01$ ), quality (phred quality  $\geq 20$ , genotype quality  $\geq 20$ ), read  
36 depth ( $\geq 10$ ).

37

## 38 **Sanger Sequencing**

39 Sanger sequencing was used to confirm the presence of the variants considered  
40 potentially pathogenic and segregation studies (primer sequences available upon  
41 request).

42

43 **X-inactivation analysis**

44 X-inactivation tested by determining the methylation status of the androgen receptor  
45 gene (AR) was evaluated as described previously<sup>53</sup>.

46

47 **Cloning and mutagenesis**

48 The wild-type UBE2A gene and Q93E mutant were amplified by PCR from mother's  
49 patients and index cDNA, respectively, and cloned into pET28a vector (Novagen), using  
50 NdeI and XhoI restriction sites. Human PCNA gene was also inserted into pET28a vector  
51 using the same restriction sites. Human RAD18 was cloned into the restriction sites  
52 BamHI e XhoI of a modified version of pETSUMO (Invitrogen). Expression plasmids for  
53 human Uba1 and Ub (both in pET3a) were donated by Drs. Titia Sixma and Chris Hill,  
54 Addgene plasmids #63571 and #61937, respectively. All point mutations in UBE2A  
55 (Q93E, Q93A, Q93R, C88S, C88S/Q93E, R7W, R11Q, G23R) were created using basic  
56 PCR-based site-directed mutagenesis and confirmed by Sanger sequencing.

57

58 **Protein expression and purification**

59 Wild-type UBE2A (residues 1-152) and mutants (Q93E, Q93A, Q93R, C88S, C88S/Q93E,  
60 R7W, R11Q, G23R) were expressed from pET28a (Novagen) as an N-terminal His6-tag  
61 fusion. Rosetta II E. coli cells (Novagen) were used to express the proteins in LB media  
62 at 37°C for 5 hours at 200 rpm. The culture temperature was turned down to 18 °C for  
63 1 hour before induction with 0.2 mM IPTG (isopropyl β -D-1-thiogalactopyranoside)

64 and cells were grown at 18°C for 16 h, then harvested by centrifugation (5,000 × g for  
65 10 min at 4 °C). Cells were disrupted by sonication in lysis buffer (50 mM Tris pH 7.5,  
66 300 mM NaCl, 10% glycerol, 2 mM β-mercaptoethanol and 1 mM phenylmethylsulfonyl  
67 fluoride) containing 0.2 mg/mL lysozyme and centrifuged to remove cellular debris (40  
68 000 x g for 60 min at 4 °C). Proteins were first purified on a HisTrap column (GE  
69 Healthcare) pre-equilibrated with binding buffer containing 50 mM Tris pH 7.5, 300  
70 mM NaCl, 2 mM β-mercaptoethanol and eluted using a linear gradient of same buffer  
71 containing 500 mM imidazole, in an AKTA Purifier system (GE Healthcare). The His6-  
72 tag was cleaved by thrombin protease and the proteins were further purified by a  
73 Superdex 75 column (GE Healthcare) with buffer containing 50 mM Tris pH 7.5, 300  
74 mM NaCl, 1 mM dithiothreitol. After concentration to 10 mg/ml, proteins were flash-  
75 frozen in liquid nitrogen and stored at -80°C. Recombinant purified UBE2A proteins  
76 are shown in Supplementary Figure 12. Human Uba1, Ub, SUMO-RAD18 and PCNA were  
77 expressed and purified as previously described<sup>21,54,55</sup>.

78

## 79 **Crystal Structure Determination**

80 Crystals were obtained by sitting-drop vapor diffusion at 18°C mixing equal volumes of  
81 protein at 10 mg/mL and the reservoir solution containing 50 mM di-Sodium succinate  
82 pH 7.0 and 12-14% PEG 3350. Harvested crystals were cryoprotected with 10%  
83 ethylene glycol added to the mother liquor (v/v). Data were collected at 1.46 Å at the  
84 beamline W01B-MX2 (LNLS) at 100 K, processed using XDS<sup>56</sup> and merged and scaled  
85 with Aimless<sup>57</sup>. The structures were solved by molecular replacement using MolRep<sup>57</sup>.

86 The human UBE2B protein (PDB ID code 2YB6)<sup>21</sup> was used as search model for WT  
87 UBE2A, which structure was used as search model for Q93E mutant. The models were  
88 refined using Phenix program (phenix.refine)<sup>58</sup> and the quality of the final models was  
89 assessed with MolProbity. The crystallographic parameters and final refinement  
90 statistics are summarized in Supplementary Table 1. Both final models contained  
91 97.3% of residues in favored regions and 2.7% in allowed regions of the Ramachandran  
92 plot (no outliers).

93

#### 94 **NMR spectroscopy**

95 <sup>15</sup>N-labeled WT- and Q93E-UBE2A proteins were produced in M9 minimal media  
96 supplemented with 1 g/L <sup>15</sup>NH<sub>4</sub>Cl (Cambridge Isotope Laboratories). To produce  
97 <sup>13</sup>C/<sup>15</sup>N-labeled Q93E-UBE2A the M9 was also supplemented with 4 g/L [<sup>13</sup>C<sub>6</sub>]-D(+)-  
98 glucose (Cambridge Isotope Laboratories). The expression and purification protocols  
99 were performed as described for the unlabeled proteins. The gel filtration final buffer  
100 contained 50 mM K<sub>2</sub>HPO<sub>4</sub>-KH<sub>2</sub>PO<sub>4</sub> (pH 8.0), 200 mM NaCl, 1 mM DTT. Labeled proteins  
101 were concentrated to 750 μM and 10% D<sub>2</sub>O was added. NMR spectra were recorded at  
102 25<sup>o</sup>C on an Agilent Inova 500-MHz spectrometer. The spectra were processed with  
103 NMRPipe/NMRDraw<sup>59</sup> and analyzed with NMRView<sup>60</sup>. The backbone assignment of  
104 Q93E-UBE2A was determined using the three-dimensional experiments HNCACB,  
105 CBCA(CO)NH, HNCO, and HN(CA)CO and the graphical interface Smartnotebook.

106

#### 107 **NMR Thioester and Oxyester Reactions**

108 Thioester reaction was performed in the NMR tube (in 200  $\mu$ L) using 60  $\mu$ M  $^{15}$ N-UBE2A,  
109 180  $\mu$ M ubiquitin and 3  $\mu$ M Uba1 in buffer containing 50 mM Tris pH 8.0, 150 mM NaCl,  
110 5 mM MgCl<sub>2</sub>, 0.5 mM DTT. For oxyester reactions, 400  $\mu$ M  $^{15}$ N-C88S-UBE2A or  $^{15}$ N-  
111 C88S/Q93E-UBE2A was mixed with 650  $\mu$ M ubiquitin and 6  $\mu$ M Uba1, or conversely,  
112 200  $\mu$ M  $^{15}$ N-Ub was put together with 325  $\mu$ M C88S-UBE2A or C88S/Q93E-UBE2A and  
113 3  $\mu$ M Uba1, in the same buffer used for thioester reaction. All reactions were conducted  
114 at 30°C and started with addition of 10 mM ATP. Sequential ( $^1$ H, $^{15}$ N)-HSQC spectra were  
115 acquired on a 600-MHz spectrometer (Agilent Inova) equipped with a cryogenic probe.  
116 We used the backbone resonance assignment of apo ubiquitin available on BMRB (code  
117 4769).

118

### 119 ***In vitro* Ubiquitination Assay**

120 Ubiquitination assays were performed at 32°C using 1  $\mu$ M human recombinant Uba1,  
121 30  $\mu$ M human recombinant ubiquitin and 20  $\mu$ M WT- or Q93E-UBE2A in the  
122 ubiquitination buffer: 50 mM Tris pH 8.0, 50 mM NaCl, 50 mM KCl, 10 mM MgCl<sub>2</sub>, 0.1  
123 mM DTT. Reactions were started by addition of 3 mM ATP and quenched with an equal  
124 volume of 2X SDS-PAGE buffer (reducing or non-reducing). Samples collected in specific  
125 time points were resolved by SDS-PAGE followed by Western blot using anti-ubiquitin  
126 antibody (P4D1 - Santa Cruz). *In vitro* ubiquitination assay in different pHs were  
127 conducted identically to described above replacing the buffer: sodium acetate for pH 5,  
128 MES for pH 6, Tris for pH 7-9 and Caps for pH 10-11. For intrinsic reactivity assays, WT-  
129 and Q93E-UBE2A were charged for 15 minutes at 32°C in ubiquitination buffer before

130 being mixed with 10 mM EDTA and 25 mM of lysine or 5 mM hydroxylamine, and  
131 incubated at 32°C. Samples were collected at several time points during the reaction,  
132 quenched in non-reducing SDS-PAGE buffer and visualized by Coomassie stained SDS-  
133 PAGE. PCNA mono-ubiquitination was performed by mixing 1 μM Uba1, 30 μM  
134 ubiquitin, 20 μM WT- or Q93E-UBE2A, 5 μM SUMO-Rad18 and 1 μM PCNA in the  
135 ubiquitination buffer supplemented with 2 μM ZnCl<sub>2</sub> and incubated at 32°C in the  
136 presence of 3 mM ATP, followed by anti-PCNA (P8825 - Sigma) Western blot.

137

### 138 **Single-turnover diubiquitin formation assay**

139 Diubiquitin formation assay was conducted in a two-step reaction. First, charging of  
140 UBE2A was achieved by mixing 20 μM of WT- or Q93E-UBE2A with 1 μM E1, 30 μM  
141 lysine-free ubiquitin (K0-Ub) and 3 mM ATP in the ubiquitination buffer (pH 8). After  
142 incubation for 15 minutes at 37 °C, reaction was stopped by addition of 25 mM EDTA  
143 and then diluted four times in ubiquitination buffer at pH 8 or 9 (both using 50 mM  
144 Tris-HCl), resulting in final concentrations of 0,25 μM E1, 5 μM UBE2A and 7,5 μM  
145 lysine-free ubiquitin. Di-ubiquitin formation was triggered by addition of 7,5 μM WT-  
146 ubiquitin. Reactions were kept at 32°C, samples were collect at different timepoints and  
147 immediately quenched in reducing SDS-PAGE buffer. Results were evaluated by  
148 western blot using anti-ubiquitin antibody (P4D1 - Santa Cruz), followed by  
149 quantification of corresponding di-ubiquitin band with ImageJ.

150

### 151 **Molecular Modeling**

152 UBE2A was covalently bound to ubiquitin using as template the UBE2N~Ub structure  
153 (PDB ID code 5aiu)<sup>30</sup>. UBE2A was superposed to UBE2N and the complex formed by  
154 UBE2A and ubiquitin was submitted to energy minimization using steepest descent  
155 followed by simulated annealing protocol (SD/SA) to remove bad contacts, fixing  
156 backbone atoms of UBE2A and ubiquitin. Following, we created the thioester bond  
157 between the carboxyl group of the terminal glycine residue of ubiquitin and the  
158 sulfhydryl group of catalytic Cys88 of UBE2A. To correct the bond angle and length, a  
159 new round of energy minimization using SD/SA was performed, fixing the backbone  
160 atoms of Cys88. All steps were performed using YASARA software and the AMBER03  
161 force field. To position a second free-ubiquitin molecule with a lysine positioned to  
162 attack the thioester bond, we used the template of Mms2-Ubc13 covalently bound to  
163 ubiquitin and presenting the Lys63 residue from another symmetric lysine positioned  
164 close to the thioester bond (PDB ID code 2gmi)<sup>37</sup>, when applied the symmetry  
165 operators of P2<sub>1</sub>2<sub>1</sub>2<sub>1</sub> space group using Pymol. We superposed UBE2A to Ubc13 to  
166 position the second ubiquitin generated by symmetry close to thioester bond. Then,  
167 the backbone atoms of UBE2A~Ub was fixated and an energy minimization using  
168 SD/SA was carried out to eliminate bad contacts.

169

## 170 **Statistical analysis**

171 Crystallographic statistics are indicated in Supplementary Table 1. All western blot  
172 experiments were repeated independently three times with similar results. (<sup>1</sup>H,<sup>15</sup>N)-  
173 HSQC spectra of UBE2A proteins (WT, Q93E, C88S, C88S/Q93E) were



174 repeated independently at least two times with similar results. Each oxyester and  
175 thioester reaction and subsequent NMR data collection was performed once. Data  
176 from discharge assays, diubiquitin formation and PCNA monoubiquitination assays  
177 were derived from three independent experiments and are presented as the  
178 mean  $\pm$  standard deviation. The diubiquitin production rates were determined from a  
179 linear regression. The PCNA monoubiquitination formation data were fitted according  
180 to the equation:  $PCNA-Ub = Plateau(1 - e^{-Kt})$ , where PCNA-Ub is the fraction of  
181 monoubiquitinated PCNA, Plateau is the PCNA-Ub value at infinite times, K is the rate  
182 constant, t is time, and  $t_{1/2} = \ln(2)/K$ .

183

#### 184 **DATA AVAILABILITY**

185

186 The atomic coordinates and structure factors have been deposited in the Protein Data  
187 Bank under accession codes 6CYO (WT-UBE2A) and 6CYR (Q93-UBE2A).

188

#### 189 **METHODS-ONLY REFERENCES**

190

- 191 51. Li, H. & Durbin, R. Fast and accurate short read alignment with Burrows-  
192 Wheeler transform. *Bioinformatics* **25**, 1754–1760 (2009).
- 193 52. DePristo, M. A. *et al.* A framework for variation discovery and genotyping using  
194 next-generation DNA sequencing data. *Nat. Genet.* **43**, 491–498 (2011).

- 195 53. Allen, R. C., Zoghbi, H. Y., Moseley, a B., Rosenblatt, H. M. & Belmont, J. W.  
196 Methylation of HpaII and HhaI sites near the polymorphic CAG repeat in the  
197 human androgen-receptor gene correlates with X chromosome inactivation. *Am.*  
198 *J. Hum. Genet.* **51**, 1229–39 (1992).
- 199 54. Pickart, C. M. & Raasi, S. Controlled Synthesis of Polyubiquitin Chains. in  
200 *Methods in Enzymology* **399**, 21–36 (2005).
- 201 55. Zheleva, D. I. *et al.* A quantitative study of the in vitro binding of the C-terminal  
202 domain of p21 to PCNA: Affinity, stoichiometry, and thermodynamics.  
203 *Biochemistry* **39**, 7388–7397 (2000).
- 204 56. Kabsch, W. XDS. *Acta Crystallogr. Sect. D Biol. Crystallogr.* **66**, 125–132 (2010).
- 205 57. Winn, M. D. *et al.* Overview of the CCP 4 suite and current developments. *Acta*  
206 *Crystallogr. Sect. D Biol. Crystallogr.* **67**, 235–242 (2011).
- 207 58. Adams, P. D. *et al.* PHENIX : a comprehensive Python-based system for  
208 macromolecular structure solution. *Acta Crystallogr. Sect. D Biol. Crystallogr.* **66**,  
209 213–221 (2010).
- 210 59. Delaglio, F. *et al.* NMRPipe: a multidimensional spectral processing system  
211 based on UNIX pipes. *J. Biomol. NMR* **6**, 277–93 (1995).
- 212 60. Johnson, B. A. & Blevins, R. A. NMR View: A computer program for the  
213 visualization and analysis of NMR data. *J. Biomol. NMR* **4**, 603–614 (1994).

214
